# Supplementary material for: Temporally and spatially resolved SPR imaging of electrical double layer dynamics in electrolyte-gated transistors with ionic liquid
Source: Royal Society of Chemistry journal article supplement (doi:10.1039/d4tc01295j), 2024-01-01
Supplement: d4tc01295j1.pdf [file d4tc01295j1.pdf]

## Supporting Information

# Temporal and Spatial Resolved SPR Imaging of Electric-Double-Layer dynamics in Electrolyte- Gated Transistors with Ionic Liquid

*Xuelin Wang, Xueyi Luo, Peng Wang*

State Key Laboratory of Precision Measurement Technology and Instruments,

Department of Precision Instrument,

Tsinghua University, Beijing 100084, PR China

## Complementary Theoretical Basis

Fresnel equations and interference theory were used to analyze the light intensity and phase caused by the refraction and reflection of light waves in the multilayer structure:

$$r_m = \frac{r_{0,1}^m + r_{1,3}^m e^{2idk_{z1}}}{1 + r_{0,1}^m r_{1,3}^m e^{2idk_{z1}}}, (i = \sqrt{-1}, m = p, s) \quad (1)$$

$$k_{x0} = \frac{\omega}{c} \sqrt{\varepsilon_0} \sin \theta \quad (2)$$

$$k_{zj} = \sqrt{\left(\frac{\omega}{c}\right)^2 \varepsilon_j - k_{x0}^2}, (j = 0, 1, 2, 3) \quad (3)$$

$$r_{j,j+1}^p = \frac{\frac{\varepsilon_{j+1}}{k_{zj+1}} - \frac{\varepsilon_j}{k_{zj}}}{\frac{\varepsilon_{j+1}}{k_{zj+1}} + \frac{\varepsilon_j}{k_{zj}}}, (j = 0, 1, 2) \quad (4)$$

$$r_{j,j+1}^s = \frac{k_{zj+1} - k_{zj}}{k_{zj+1} + k_{zj}}, (j = 0, 1, 2) \quad (5)$$

Formula (1) is Fresnel's equation, where  $r$  is the reflection coefficient,  $m$  represents p-polarized light and S-polarized light respectively.  $d$  is the thickness of Au film thickness,  $k_x$ ,  $k_z$  are wave vectors in different directions. Formula (2) ~ (5) is the calculation formula of reflection coefficient of each layer. Layer 0, 1, 2, 3 are glass layer, metal layer, semiconductor layer and dielectric layer respectively,  $\theta$  is the incident Angle,  $\varepsilon$  is the dielectric coefficient of each layer.

According to the principle of SPR, when the polarized light incident sensor prism excites SPR, the intensity and phase of p component of the reflected light change dramatically, while the intensity and phase change of s component are not obvious, and the phase difference between p component and s component is very sensitive to the refractive index of the measuring medium.

Therefore, by using the 1/2 wave plate, the p component and the s component are rotated counterclockwise by 45° and 225° respectively, and then the two interference beams are translated in the exit direction by the beam shifter, then the respective light intensity is:

$$I_1 = \frac{E_i^2 \left[ r_s^2 \cos^2 \alpha + r_p^2 \sin^2 \alpha - 2r_s r_p \sin \alpha \cos \alpha \cos(\varphi_p - \varphi_s) \right]}{2} \quad (6)$$

$$I_2 = \frac{E_i^2 \left[ r_s^2 \cos^2 \alpha + r_p^2 \sin^2 \alpha + 2r_s r_p \sin \alpha \cos \alpha \cos(\varphi_p - \varphi_s) \right]}{2} \quad (7)$$

Here, the refractive index related factor (RIRF) is defined:

$$RIRF = \frac{I_1 - I_2}{I_1 + I_2} = \frac{-2r_s r_p \sin \alpha \cos \alpha \cos(\varphi_p - \varphi_s)}{r_s^2 \cos^2 \alpha + r_p^2 \sin^2 \alpha} \quad (8)$$

Where  $\alpha$  is the polarized angle,  $\varphi_p$  and  $\varphi_s$  are the phases of p light and s light.

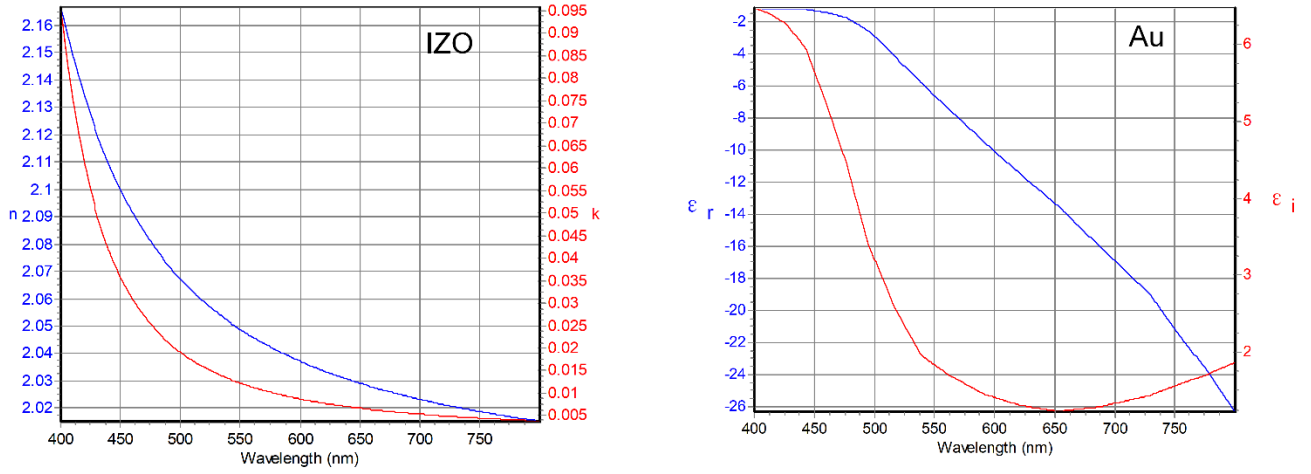

**Figure S1.** Permittivity measured by an ellipsometric instrument (a) Permittivity curve of IZO film (b) Permittivity curve of Au film

**Table S1.** Measurement results of film parameters

| material | thickness | n     | k     | $\epsilon_r$ | $\epsilon_i$ |
|----------|-----------|-------|-------|--------------|--------------|
| Au       | 350 Å     |       |       | -12.215      | 1.272        |
| IZO      | 310 Å     | 2.032 | 0.007 | 4.129        | 0.028        |

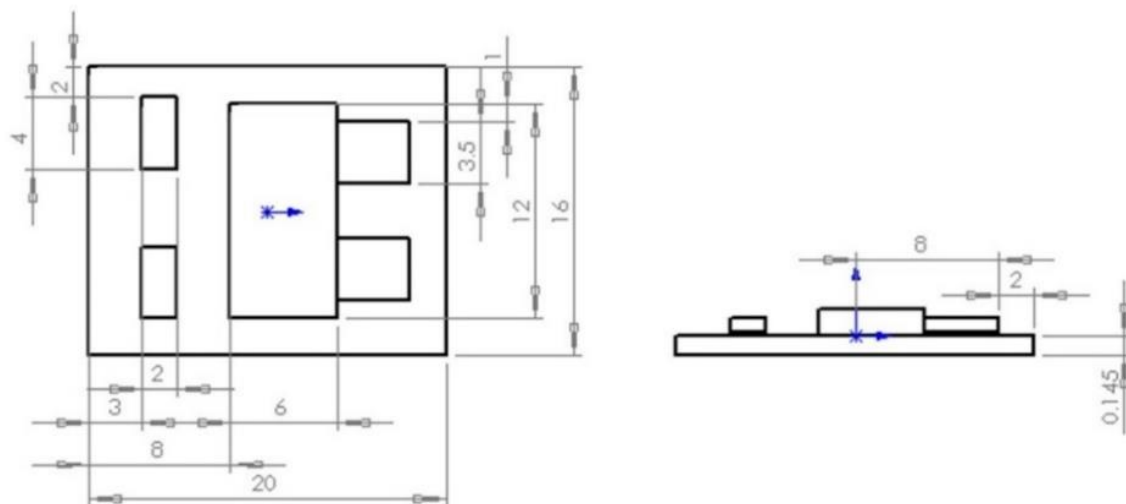

**Figure S2.** EGTs-SPR Sensor Module Design Coupled with SPR imaging detection structure  
(length unit: mm)

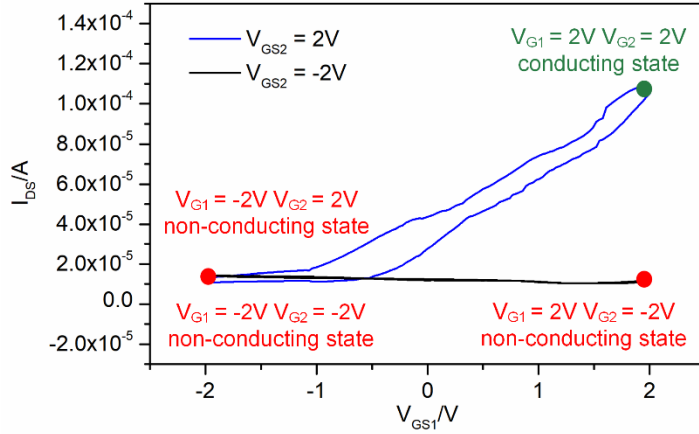

**Figure S3.** The AND logic operation function realization under the control of dual gate voltage modulation

**Table S2.** Dual gate voltage modulation AND logical operation truth table.

| $V_{G1}$ | $V_{G2}$ | $I_{DS}$ |
|----------|----------|----------|
| '0'      | '0'      | '0'      |
| '0'      | '1'      | '0'      |
| '1'      | '0'      | '0'      |
| '1'      | '1'      | '1'      |

As shown in Figure S3, the negative gate voltage represents '0', and the positive gate voltage represents '1'.  $I_{DS}$  less than 0.04mA indicates '0', meaning non-conducting state.  $I_{DS}$  larger than 0.04mA indicates '1', meaning conducting state.
